# Supplementary material
Source: PubMed Central journal article supplement (PMC7050390)
Supplement: NIHMS1048019-supplement-Supplemental_Material.pdf [file NIHMS1048019-supplement-Supplemental_Material.pdf]

## Supplementary Materials

## Table of Contents

|                                                                     |    |
|---------------------------------------------------------------------|----|
| Participant Exclusion                                               | 2  |
| Individual Difference Descriptive Statistics                        | 3  |
| List of Individual Difference Measures                              | 6  |
| Survey Questionnaire Items and Response Options                     | 9  |
| Data Cleaning Process                                               | 12 |
| Characteristics of Non-Regulatory Episodes                          | 14 |
| Emotion Regulatory Goals                                            | 16 |
| Emotion Regulatory Contexts                                         | 17 |
| Full Results of Age x Strategy x Tactic ANOVA                       | 19 |
| Simple Effects for 3-Way Interaction: By Strategy                   | 20 |
| Simple Effects for 3-Way Interaction: By Age Group                  | 23 |
| Use of Multiple Strategies/Tactics within an Episode                | 26 |
| Age Differences in Use of Multiple Strategies/Tactics               | 27 |
| Relationship Between Number of Strategies/Tactics and Affect Change | 28 |
| Correlations Among Strategies Within Episodes                       | 30 |
| Correlations Among Tactics Within Episodes                          | 31 |
| Person-Level Principal Factor Analysis of Tactic Use                | 32 |
| Episode-Level Principal Factor Analysis of Tactic Use               | 33 |
| Effectiveness Controlling for Multiple Strategies                   | 34 |
| Effectiveness Controlling for Multiple Tactics                      | 35 |
| Multiple Regression with Age as a Continuous Variable               | 40 |
| Multiverse Analyses of Strategy and Tactic Use                      | 44 |

Table S1: *Participant Exclusion Frequency and Reasons*

| Participant | Age Group | N Surveys | N Valid | Reason for Exclusion               |
|-------------|-----------|-----------|---------|------------------------------------|
| 196102      | YA        | 3         | 3       | Too few surveys; technical problem |
| 196103      | YA        | 20        | 10      | Too few surveys; technical problem |
| 196106      | YA        | 218       | 131     | Too many surveys                   |
| 196120      | YA        | 9         | 8       | Too few surveys; technical problem |
| 196123      | YA        | 102       | 94      | Too many surveys                   |
| 196137      | YA        | 4         | 3       | Too few surveys; technical problem |
| 196138      | YA        | 0         | 0       | Responses did not record           |
| 196206      | MA        | 8         | 8       | Too few surveys; technical problem |
| 196208      | MA        | 9         | 9       | Too few surveys; technical problem |
| 196209      | MA        | 4         | 4       | Too few surveys; technical problem |
| 196210      | MA        | 3         | 3       | Too few surveys; technical problem |
| 196213      | MA        | 5         | 4       | Too few surveys; technical problem |
| 196220      | MA        | 3         | 3       | Too few surveys; technical problem |
| 196221      | MA        | 5         | 3       | Too few surveys; technical problem |
| 196223      | MA        | 117       | 109     | Too many surveys                   |
| 196224      | MA        | 13        | 10      | Too few surveys; technical problem |
| 196228      | MA        | 3         | 2       | Too few surveys; technical problem |
| 196305      | OA        | 5         | 4       | Too few surveys; unknown reason    |
| 196306      | OA        | 36        | 0       | Responses did not record           |
| 196310      | OA        | 13        | 9       | Too few surveys; technical problem |
| 196311      | OA        | 178       | 45      | Too many surveys                   |
| 196362      | OA        | 43        | 42      | Out of age range (88 years old)    |

Table S2: Means and standard deviations of individual difference measures by age group

| Variable                           | $\alpha$ | Younger       | Middle-Aged     | Older            |
|------------------------------------|----------|---------------|-----------------|------------------|
| Age                                |          | 26.22 (5.62)  | 50.68 (5.94)*** | 66.56 (4.81)***  |
| Mini-Mental State Exam             |          | 95.13 (4.42)  | 94.84 (5.36)    | 96.67 (5.15)     |
| Digit span forward                 |          | 11.56 (2.53)  | 10.36 (2.60)*   | 10.74 (2.26)     |
| Digit span backward                |          | 7.80 (2.43)   | 6.02 (2.25)**   | 6.82 (2.80)      |
| Letter fluency                     |          | 14.66 (4.36)  | 14.66 (5.01)    | 16.18 (5.35)     |
| Category fluency                   |          | 20.64 (4.55)  | 19.88 (5.55)    | 20.00 (5.50)     |
| Vocabulary                         |          | 12.96 (3.79)  | 11.52 (4.00)*   | 14.78 (2.79)**   |
| Emo. Malleability T1 <sup>a</sup>  | .789     | 69.45 (12.01) | 67.31 (12.88)   | 78.33 (13.41)*** |
| Emo. Malleability T2 <sup>a</sup>  | .840     | 69.67 (10.01) | 70.36 (12.46)   | 79.81 (18.90)*** |
| ER self-efficacy <sup>a</sup>      | .824     | 65.08 (17.45) | 73.33 (16.72)*  | 76.84 (16.88)*** |
| Trait positive affect <sup>a</sup> | .896     | 64.17 (19.50) | 65.23 (20.38)   | 70.11 (14.72)    |
| Trait negative affect <sup>a</sup> | .893     | 25.78 (18.97) | 16.76 (14.72)*  | 17.09 (14.98)*   |
| Life Satisfaction <sup>a</sup>     | .868     | 68.33 (32.90) | 61.53 (32.14)   | 73.33 (31.22)    |
| Depression <sup>a</sup>            | .896     | 24.52 (17.14) | 21.93 (16.04)   | 14.16 (12.00)**  |
| Optimism <sup>a</sup>              | .830     | 59.83 (21.62) | 68.86 (14.93)*  | 78.08 (17.81)*** |
| Trait reappraisal <sup>a</sup>     | .839     | 67.18 (15.57) | 67.86 (18.03)   | 77.11 (16.70)**  |
| Trait suppression <sup>a</sup>     | .742     | 43.92 (19.77) | 40.67 (20.99)   | 37.70 (22.83)    |
| Savoring anticipation <sup>a</sup> | .843     | 69.56 (14.33) | 69.10 (18.45)   | 75.81 (16.47)    |
| Savoring present <sup>a</sup>      | .843     | 63.86 (16.82) | 68.51 (19.52)   | 76.94 (15.31)*** |
| Savoring reminiscence <sup>a</sup> | .850     | 68.73 (17.61) | 71.62 (17.31)   | 80.21 (14.95)*** |
| Savoring total <sup>a</sup>        | .928     | 67.39 (12.95) | 69.62 (17.16)   | 77.62 (17.16)*** |
| Mood repair <sup>a</sup>           | .771     | 63.78 (22.18) | 70.18 (17.74)   | 78.59 (18.34)*** |
| Mood attention <sup>a</sup>        | .776     | 69.40 (13.28) | 68.87 (12.85)   | 72.84 (17.77)    |
| Mood clarity <sup>a</sup>          | .849     | 62.04 (17.71) | 70.18 (15.54)*  | 75.41 (16.86)*** |
| Personal control <sup>a</sup>      | .868     | 69.52 (16.53) | 70.77 (16.68)   | 77.64 (17.11)*   |
| Control- mastery <sup>a</sup>      | .797     | 75.28 (18.26) | 74.83 (18.38)   | 80.28 (15.35)    |
| Control- constraints <sup>a</sup>  | .836     | 33.76 (18.03) | 31.60 (18.56)   | 23.92 (21.41)*   |
| BFI extraversion <sup>a</sup>      | .844     | 60.92 (16.28) | 62.59 (16.60)   | 70.98 (16.95)**  |

|                                      |            |               |                |                  |
|--------------------------------------|------------|---------------|----------------|------------------|
| Sociability <sup>a</sup>             | .767       | 51.88 (23.77) | 55.65 (23.18)  | 65.88 (20.45)**  |
| Assertiveness <sup>a</sup>           | .685       | 60.88 (18.68) | 64.29 (20.24)  | 69.88 (20.43)*   |
| Energy level <sup>a</sup>            | .662       | 70.00 (18.60) | 67.60 (16.66)  | 77.21 (19.73)    |
| BFI agreeableness <sup>a</sup>       | .809       | 68.74 (15.11) | 72.29 (14.17)  | 78.19 (15.02)**  |
| Compassion <sup>a</sup>              | .497       | 70.63 (19.01) | 70.13 (18.57)  | 72.19 (21.91)**  |
| Respectfulness <sup>a</sup>          | .733       | 75.75 (18.93) | 79.85 (16.67)  | 84.71 (16.49)*   |
| Trust <sup>a</sup>                   | .682       | 60.46 (20.73) | 64.63 (20.23)  | 68.63 (19.25)*   |
| BFI conscientiousness <sup>a</sup>   | .880       | 68.21 (16.84) | 75.79 (18.53)* | 77.89 (16.08)**  |
| Organization <sup>a</sup>            | .836       | 71.50 (23.66) | 78.06 (22.32)  | 75.11 (23.40)    |
| Productiveness <sup>a</sup>          | .765       | 68.04 (20.00) | 74.96 (22.58)  | 78.46 (18.40)**  |
| Responsibility <sup>a</sup>          | .648       | 66.13 (17.91) | 74.49 (18.66)* | 79.38 (17.37)*** |
| BFI negative emotion <sup>a</sup>    | .829       | 48.46 (17.42) | 41.35 (16.66)* | 36.10 (17.66)*** |
| Anxiety <sup>a</sup>                 | .777       | 56.75 (22.79) | 49.79 (22.65)  | 43.67 (23.76)**  |
| Depression <sup>a</sup>              | .781       | 40.75 (24.91) | 29.97 (20.33)* | 24.13 (21.24)*** |
| Emotional volatility <sup>a</sup>    | .804       | 43.13 (24.00) | 39.67 (24.59)  | 28.04 (21.06)**  |
| BFI openness <sup>a</sup>            | .807       | 73.41 (11.80) | 70.27 (19.09)  | 79.12 (13.07)    |
| Intellectual curiosity <sup>a</sup>  | .632       | 78.88 (14.87) | 70.15 (21.59)* | 83.00 (15.31)    |
| Aesthetic sensitivity <sup>a</sup>   | .646       | 69.50 (15.34) | 67.81 (23.23)  | 76.60 (18.54)    |
| Creative imagination <sup>a</sup>    | .670       | 71.88 (16.43) | 73.04 (21.76)  | 78.25 (18.13)    |
| Current stress <sup>b</sup>          |            | 2.38 (.97)    | 2.16 (1.14)    | 1.83 (1.00)**    |
| Self-esteem <sup>b</sup>             |            | 3.60 (1.11)   | 3.47 (1.21)    | 5.06 (1.11)*     |
| Self-reported health T1 <sup>b</sup> |            | 3.67 (.90)    | 3.56 (.71)     | 3.68 (.84)       |
| Self-reported health T2 <sup>b</sup> |            | 2.44 (.88)    | 2.54 (.82)     | 2.22 (.91)       |
|                                      | Total      | YA            | MA             | OA               |
| N total                              | 150        | 50            | 50             | 50               |
| N (%) Female                         | 79 (52.7)  | 28 (56.0)     | 27 (54.0)      | 24 (48.0)        |
| N (%) Hispanic                       | 10 (7.1)   | 5 (10.4)      | 3 (6.7)        | 2 (4.3)          |
| N (%) White                          | 72 (49.0)  | 20 (40.8)     | 20 (40.8)      | 32 (65.3)        |
| N (%) Black/Afr.-Am.                 | 50 (34.0)  | 9 (18.4)      | 27 (55.1)      | 13 (28.6)        |
| N (%) Asian-Am.                      | 30 (20.3)  | 25 (50.0)     | 2 (4.1)        | 3 (6.1)          |
| N (%) Native English                 | 121 (81.8) | 29 (59.2)     | 44 (88.0)      | 48 (98.0)        |

|                      |           |               |                 |                |
|----------------------|-----------|---------------|-----------------|----------------|
| N (%) College degree | 74 (50.3) | 27 (55.1)     | 14 (28.6)       | 33 (67.3)      |
| N (%) Employed       | 63 (43.4) | 24 (50.0)     | 22 (44.9)       | 17 (35.4)      |
| N (%) Single         | 92 (63.0) | 41 (83.7)     | 31 (63.3)       | 20 (41.7)      |
| N (%) Mental Illness | 16 (11.0) | 7 (14.6)      | 3 (6.4)         | 6 (12.0)       |
| N (%) Excluded       | 20 (11.8) | 5 (9.1)       | 10 (16.7)       | 5 (9.1)        |
| <hr/>                |           |               |                 |                |
| N surveys            |           | 48.27 (14.77) | 57.40 (17.65)** | 56.10 (15.30)* |
| N valid surveys      |           | 44.96 (13.62) | 51.64 (12.89)*  | 51.54 (12.25)* |
| % surveys excluded   |           | 6.28 (9.18)   | 8.65 (9.32)     | 7.23 (10.51)   |

<sup>a</sup> These measures were rescaled to range from 0-100 using POMP scoring (Cohen, Cohen, Aiken, & West, 1999). <sup>b</sup> Single-item measures. Planned contrasts compared middle-aged to younger and older to younger. \*  $p < .05$ , \*\*  $p < .01$ , \*\*\*  $p < .001$ .

Cohen, P., Cohen, J., Aiken, L. S., & West, S. G. (1999). The problem of units and the circumstance for POMP. *Multivariate behavioral research*, 34, 315-346.

[http://dx.doi.org/10.1207/S15327906MBR3403\\_2](http://dx.doi.org/10.1207/S15327906MBR3403_2)

**Individual Difference Measures**

Mini-Mental State Exam (Folstein, Folstein, & McHugh, 1975)

WAIS forward- and backward-digit span task (Wechsler, 1997)

Shipley vocabulary test (Zachary, 1991)

Positive and Negative Affect Schedule (Watson, Clark, & Tellegen, 1988)

Emotion Regulation Questionnaire (Gross & John, 2003)

Center for Epidemiological Studies—Depression (Radloff, 1977)

Emotion Regulation Self-Efficacy (Kirk, Schutte, & Hine, 2008)

Emotional Mindset Scale (Livingstone, 2012)

Midlife Control Scale (Lachman & Weaver, 1998)

Life Orientation Test (revised) (Scheier, Carver, & Bridges, 1994)

Satisfaction with Life Scale (Diener, Emmons, Larsen, & Griffin, 1985)

Savoring Beliefs Inventory (Bryant, 2003)

Trait Meta-Mood Scale (Salovey, Mayer, Goldman, Turvey, & Palfai, 1995)

Big Five Inventory 2 (Soto & John, 2017)

- Bryant, F. (2003). Savoring Beliefs Inventory (SBI): A scale for measuring beliefs about savouring. *Journal of Mental Health, 12*, 175-196.
- Diener, E. D., Emmons, R. A., Larsen, R. J., & Griffin, S. (1985). The satisfaction with life scale. *Journal of Personality Assessment, 49*, 71-75.
- Folstein, M. F., Folstein, S. E., & McHugh, P. R. (1975). "Mini-mental state": A practical method for grading the cognitive state of patients for the clinician. *Journal of Psychiatric Research, 12*, 189-198.
- John, O. P., & Gross, J. J. (2004). Healthy and unhealthy emotion regulation: Personality processes, individual differences, and life span development. *Journal of Personality, 72*, 1301-1334. <http://dx.doi.org/10.1111/j.1467-6494.2004.00298.x>
- Kirk, B. A., Schutte, N. S., & Hine, D. W. (2008). Development and preliminary validation of an emotional self-efficacy scale. *Personality and Individual Differences, 45*, 432-436.
- Lachman, M. E., & Weaver, S. L. (1998). The sense of control as a moderator of social class differences in health and well-being. *Journal of Personality and Social Psychology, 74*, 763-773.
- Livingstone, K. M. (2012). *The effects of implicit theories of emotion regulation and experience* (Doctoral dissertation). University of Oregon, Eugene, OR.
- Radloff, L. S. (1977). The CES-D Scale: A self-report depression scale for research in the general population. *Journal of Applied Psychological Measures, 1*, 385-401.
- Salovey, P., Mayer, J. D., Goldman, S. L., Turvey, C., & Palfai, T. P. (1995). Emotional attention, clarity, and repair: Exploring emotional intelligence using the Trait Meta-Mood

Scale. In J.W. Pennebaker (Ed.), *Emotion, Disclosure, and Health* (pp. 125-154).

Washington, DC: American Psychological Association.

Scheier, M. F., Carver, C. S., & Bridges, M. W. (1994). Distinguishing optimism from neuroticism (and trait anxiety, self-mastery, and self-esteem): A re-evaluation of the Life Orientation Test. *Journal of Personality and Social Psychology*, *67*, 1063-1078.

Soto, C. J., & John, O. P. (2017). The next Big Five Inventory (BFI-2): Developing and assessing a hierarchical model with 15 facets to enhance bandwidth, fidelity, and predictive power. *Journal of personality and social psychology*, *113*, 117-143.

Watson, D., Clark, L.A., & Tellegen, A. (1988). Development and validation of brief measures of positive and negative affect: The PANAS scales. *Journal of Personality and Social Psychology*, *54*, 1063-1070.

Weschler, D., Coalson, D. L., & Raiford, S. E. (1997). *WAIS-III: Wechsler adult intelligence scale*. San Antonio, TX: Psychological Corporation.

Zachary, R. A. (1991). Shipley institute of living scale: Revised manual. Los Angeles, CA: Western Psychological Services.



**Experience Sampling Survey Items**

1. How are you feeling right now?

| Very negative | Negative | A little negative | Neutral | A little positive | Positive | Very positive |
|---------------|----------|-------------------|---------|-------------------|----------|---------------|
| 1             | 2        | 3                 | 4       | 5                 | 6        | 7             |

2. Since the last survey, have you done anything to influence your feelings?

Yes [branch to YES survey Y01]

No [branch to NO survey N01]

**NO REGULATION:**

N01. You said that you DID NOT try to influence your feelings. Did you experience any strong positive or negative emotions?

No

Yes, I accepted them/let them play out

N02. What are you doing right now?

Work or school activity

Leisure activity

Socializing

Traveling/commuting

Personal errands/tasks/chores

Other

N03. Are you currently interacting with anyone?

No [skip to N05]

Yes, one other person [show N04]

Yes, two or more other people [show N04]

N04. With whom are you interacting?

Close friend(s) or family

Acquaintance(s)

Stranger(s)

No one

[END SURVEY]

**REGULATION**

Y01. Please think of ONE event where you tried to influence your feelings. What was your goal?

- Decrease or stop negative feelings.
- Decrease or stop positive feelings.
- Increase or create positive feelings.
- Increase or create negative feelings.

Y02. What did the situation involve? Check all that apply.

- Family/Close friends
- Romantic partner
- Strangers/Acquaintances
- Work/School
- Health
- Money
- Leisure/Recreation
- Other

Y03. In this event, did you SELECT to enter or avoid a situation to influence your feelings?

- Yes [if selected, show Y04]
- No [if selected, skip to Y05]

Y04. You said that you SELECTED a situation. Did you:

- Avoid or leave a negative situation?
- Enter or seek out a positive situation?
- Enter or seek out a negative situation?

Y05. In this event, did you TAKE ACTION to change a situation to influence your feelings?

- Yes [if selected, show Y06]
- No [if selected, skip to Y07]

Y06. You said that you TOOK ACTION. Did you:

- Do or say something that would make the situation less negative?
- Do or say something that would make the situation more positive?
- Do or say something that would make the situation more negative?

Y07. In this event, did you SHIFT YOUR ATTENTION to influence your feelings?

- Yes [if selected, show Y08]  
 No [if selected, skip to Y09]

Y08. You said that you SHIFTED YOUR ATTENTION. Did you:

- Ignore or distract yourself from the negative aspects of your environment?  
 Pay attention to the positive aspects of your environment?  
 Pay attention to the negative aspects of your environment?

Y09. In this event, did you CHANGE YOUR THINKING to influence your feelings?

- Yes [if selected, show Y10]  
 No [if selected, skip to Y11]

Y10. You said that you CHANGED YOUR THINKING. Did you:

- Distance yourself or analyze the situation objectively, without emotion?  
 Think about the positive aspects or consequences of the situation?  
 Think about the negative aspects or consequences of the situation?

Y11. In this event, did you CHANGE YOUR EMOTIONAL EXPRESSION to influence your feelings?

- Yes [if selected, show Y12]  
 No [if selected, skip to Y13]

Y12. You said that you CHANGED YOUR EMOTIONAL EXPRESSION. Did you:

- Hide the expression of the emotion you were feeling?  
 Put on a smile even though you felt negative?  
 Intentionally express or exaggerate your expressions?

Y13. BEFORE trying to change your emotions, how did you feel?

| Very<br>negative | Negative | A little<br>negative | Neutral | A little<br>positive | Positive | Very<br>positive |
|------------------|----------|----------------------|---------|----------------------|----------|------------------|
| 1                | 2        | 3                    | 4       | 5                    | 6        | 7                |

Y14. AFTER trying to change your emotions, how did you feel?

| Very<br>negative | Negative | A little<br>negative | Neutral | A little<br>positive | Positive | Very<br>positive |
|------------------|----------|----------------------|---------|----------------------|----------|------------------|
| 1                | 2        | 3                    | 4       | 5                    | 6        | 7                |

[END SURVEY]

### Data Cleaning

**Participants.** One participant was excluded because they fell well outside of the age range (age=88, recruitment criteria ages 20-80). Those with fewer than 20% valid responses were also excluded ( $N=16$ ; 5 YA, 9 MA, 3 OA). Two participants were extreme outliers in number of surveys submitted (1 YA with 218 submissions, 1 OA with 178 submissions). After data cleaning, two additional participants were outliers in number of valid surveys (1 YA with 94 surveys—and about half without timestamps meaning survey lag could not be determined—and 1 MA with 109 surveys). These participants were excluded. In total, 5 YAs, 10 MAs, and 5 OAs were excluded).

**Surveys.** Of all 8739 surveys submitted, 799 (9.1% of surveys) were excluded from participants who were excluded for reasons explained in the main text. Of these, 614 came from participants who submitted too many surveys, 104 from those who recorded less than 10, 38 from participants who experienced technical problems, and 43 from the participant who was outside of the age range.

Within the 7938 surveys, 74 duplicate surveys were deleted. During the intake session, participants were told that surveys must be at least 30 minutes apart. Data were marked if they were submitted within 30 minutes of the previous report ( $N=664$ , 8.4% of surveys). Some of these were likely mistakes. Others occurred within cramming sessions, in which participants completed four or more surveys within a 20-minute period.

**Mistakes.** Because there was no “back” button on the app, and several participants had indicated that they had completed second or third surveys to correct mistakes, we examined all cases within 5 minutes of the previous survey. Of these, 67 were possible “corrections” where either a) the previous survey was partial, indicating the participant had closed the survey and began a new one, and/or b) all responses except one were identical to the previous. The clear

majority of these occurred within 1 minute of completing the previous survey (83%,  $N=59$ ); all occurred within 3 min. (maximum 2 min. 33s). Because of the inherent ambiguity of these data, both mistakes ( $N=75$ ) and corrections ( $N=67$ ) were removed (total excluded = 142).

**Cramming.** Of those with lags less than 30 minutes, 95 were labeled as “cramming,” which we defined as submitting four or more surveys within a 20-minute period. To be conservative, we excluded all surveys associated with cramming sessions, even if the first instance occurred more than 30 minutes after the previous survey (total excluded = 117).

Besides mistakes and cramming, 499 were completed within 30 minutes of the previous survey and were excluded, leaving 7106 valid surveys.

Table S3: *Proportion of Characteristics Endorsed in of Non-Regulatory Episodes*

| Question                        | YA         | MA        | OA        | All       |
|---------------------------------|------------|-----------|-----------|-----------|
| Means (SD) of Proportion Scores |            |           |           |           |
| Had no emotion <sup>a</sup>     | .66 (.27)  | .66 (.27) | .74 (.24) | .69 (.26) |
| Accepted emotion <sup>a</sup>   | .34 (.27)  | .34 (.27) | .26 (.24) | .31 (.26) |
| Doing work <sup>b</sup>         | .23 (.22)  | .15 (.22) | .10 (.16) | .16 (.21) |
| Doing leisure <sup>b</sup>      | .34 (.23)  | .29 (.23) | .53 (.25) | .39 (.25) |
| Socializing <sup>b</sup>        | .12 (.13)  | .12 (.14) | .06 (.08) | .10 (.12) |
| Traveling <sup>b</sup>          | .13 (.12)  | .11 (.17) | .08 (.10) | .10 (.13) |
| Personal tasks <sup>b</sup>     | .16 (.15)  | .16 (.17) | .18 (.19) | .17 (.17) |
| Doing other <sup>b</sup>        | .15 (.16)  | .27 (.29) | .14 (.16) | .19 (.22) |
| Interacting <sup>a</sup>        | .44 (.31)  | .44 (.30) | .29 (.27) | .39 (.30) |
| w/close others <sup>bc</sup>    | .24 (.16)  | .20 (.20) | .16 (.17) | .20 (.18) |
| w/acquaintances <sup>bc</sup>   | .09 (.13)  | .09 (.10) | .05 (.07) | .07 (.10) |
| w/strangers <sup>bc</sup>       | .03 (.05)  | .04 (.09) | .02 (.05) | .03 (.07) |
| Total sit sel ppl.              | .23 (.27)  | .21 (.26) | .11 (.18) | .18 (.25) |
| Avoided neg. ppl. <sup>b</sup>  | .08 (.16)  | .15 (.24) | .06 (.16) | .09 (.20) |
| Sought pos. ppl. <sup>b</sup>   | .13 (.17)  | .08 (.13) | .05 (.08) | .09 (.14) |
| Sought neg. ppl. <sup>b</sup>   | .02 (.04)  | .01 (.03) | .00 (.01) | .01 (.03) |
| Total sit sel act.              | .21 (.27)  | .16 (.26) | .13 (.21) | .17 (.25) |
| Avoided neg. act. <sup>b</sup>  | .07 (.14)  | .11 (.22) | .03 (.08) | .07 (.16) |
| Sought pos. act. <sup>b</sup>   | .12 (.17)  | .07 (.16) | .10 (.20) | .09 (.18) |
| Sought neg. activ. <sup>b</sup> | .02 (.040) | .01 (.06) | .01 (.02) | .01 (.04) |

*Note.* Proportions are a function of the number of surveys in which participants saw and responded to the question. <sup>a</sup> Forced choice questions in which participants could choose only one answer. <sup>b</sup> Checkbox questions in which participants could choose as many answers as applied. <sup>c</sup> Participants only saw the “who are you interacting with” question if they indicated they were interacting with one or more people. Sit sel = situation selection; ppl = people; act. = activity; neg = negative; pos = positive. YA N=48, MA N=49, OA N=48.

**What were participants' goals for emotion regulation?**Table S4: *Average Frequency of Regulatory Goals During Regulation Episodes*

| Goal              | YA        | MA        | OA          | All        |
|-------------------|-----------|-----------|-------------|------------|
| Decrease Negative | .45 (.25) | .50 (.29) | .36 (.24)   | .43 (.27)  |
| Decrease Positive | .07 (.15) | .06 (.13) | .01 (.01)** | .04 (.12)  |
| Increase Positive | .56 (.25) | .53 (.27) | .66 (.23)   | .58 (.25)  |
| Increase Negative | .04 (.07) | .03 (.07) | .01 (.03)*  | .03 (.06)  |
| Effect            | <i>F</i>  | df        | <i>p</i>    | $\eta_p^2$ |
| Decrease Negative | 3.80      | 2, 146    | .025        | .049       |
| Decrease Positive | 4.18      | 2, 146    | .017        | .054       |
| Increase Positive | 3.73      | 2, 146    | .026        | .049       |
| Increase Negative | 2.76      | 2, 146    | .066        | .036       |

*Note.* \* differs from YA group at  $p < .01$ , \*\* differs from YA group at  $p < .01$ .



**In what contexts did participants regulate their emotion?**Table S5: *Proportion of Regulatory Contexts Across Age Groups*

| Context          | YA        | MA          | OA          | All        |
|------------------|-----------|-------------|-------------|------------|
| Family/Friends   | .33 (.22) | .35 (.27)   | .33 (.23)   | .34 (.24)  |
| Romantic Partner | .17 (.21) | .23 (.31)   | .05 (.10)** | .15 (.23)  |
| Non-Close Others | .12 (.14) | .13 (.17)   | .15 (.13)   | .13 (.14)  |
| Work             | .26 (.19) | .15 (.21)** | .16 (.20)*  | .19 (.20)  |
| Health           | .10 (.14) | .13 (.19)   | .14 (.20)   | .13 (.18)  |
| Money            | .09 (.12) | .18 (.28)*  | .09 (.16)   | .12 (.20)  |
| Leisure          | .18 (.18) | .21 (.24)   | .27 (.22)   | .22 (.22)* |
| Other            | .08 (.11) | .19 (.23)** | .19 (.19)** | .15 (.19)  |
| Effect           | <i>F</i>  | df          | <i>p</i>    | $\eta_p^2$ |
| Family/Friends   | 0.16      | 2, 146      | .854        | .002       |
| Romantic Partner | 8.30      | 2, 146      | <.001       | .102       |
| Non-Close Others | 0.65      | 2, 146      | .524        | .009       |
| Work             | 4.60      | 2, 146      | .012        | .059       |
| Health           | 0.59      | 2, 146      | .554        | .009       |
| Money            | 3.37      | 2, 146      | .037        | .044       |
| Leisure          | 2.11      | 2, 146      | .125        | .028       |
| Other            | 5.52      | 2, 146      | .005        | .070       |

Table S6: *Descriptive Statistics for Age x Strategy and Age x Tactic ANOVA*

| Outcome                     | YA        | MA        | OA        | All       |
|-----------------------------|-----------|-----------|-----------|-----------|
| Aggregated by Strategy Item |           |           |           |           |
| Situation Selection         | .70 (.26) | .62 (.27) | .78 (.24) | .70 (.26) |
| Situation Modification      | .66 (.23) | .71 (.26) | .79 (.21) | .72 (.24) |
| Attentional Deploy.         | .60 (.24) | .64 (.29) | .72 (.26) | .65 (.27) |
| Cognitive Change            | .57 (.23) | .62 (.28) | .66 (.30) | .62 (.27) |
| Response Modulation         | .34 (.22) | .41 (.29) | .40 (.29) | .39 (.27) |
| Aggregated by Tactic Type   |           |           |           |           |
| Decrease negative aspects   | .20 (.14) | .25 (.20) | .18 (.15) | .21 (.17) |
| Increase positive aspects   | .33 (.15) | .33 (.18) | .41 (.16) | .36 (.17) |
| Engage negative aspects     | .06 (.06) | .05 (.05) | .05 (.05) | .05 (.06) |

*Note.* Significant effects indicate the age group significantly differed from the younger adult group: \*  $p < .05$ , \*\*  $p < .01$ , \*\*\*  $p < .001$ .

Table S7: *Full Results of Age x Strategy x Tactic ANOVA*

| Effect                  | <i>F</i> | df            | <i>p</i> | $\eta_p^2$ |
|-------------------------|----------|---------------|----------|------------|
| Age                     | 0.87     | 2, 144        | .422     | .012       |
| Strategy                | 46.44    | 3.40, 488.93  | <.001    | .244       |
| Age x Strategy          | 0.85     | 6.79, 488.93  | .542     | .012       |
| Tactic                  | 202.75   | 1.58, 228.01  | <.001    | .585       |
| Age x Tactic            | 3.47     | 3.17, 228.01  | .015     | .046       |
| Strategy x Tactic       | 44.99    | 5.81, 836.06  | <.001    | .238       |
| Age x Strategy x Tactic | 4.38     | 11.61, 836.06 | <.001    | .057       |

**Alternative Simple Effects for Three-Way Interaction**Table S8. *Tactic x Age for each Strategy*

| Effect                        | <i>F</i> | df           | <i>p</i> | $\eta_p^2$ |
|-------------------------------|----------|--------------|----------|------------|
| <b>Situation Selection</b>    |          |              |          |            |
| Age                           | 0.74     | 2, 146       | .480     | .010       |
| Tactic                        | 162.37   | 1.51, 219.81 | <.001    | .527       |
| Age x Tactic                  | 8.15     | 3.01, 219.81 | <.001    | .100       |
| <b>Situation Modification</b> |          |              |          |            |
| Age                           | 1.45     | 2, 145       | .238     | .020       |
| Tactic                        | 212.65   | 1.55, 223.99 | <.001    | .595       |
| Age x Tactic                  | 5.22     | 3.09, 223.99 | .001     | .067       |
| <b>Attentional Deployment</b> |          |              |          |            |
| Age                           | 0.57     | 2, 145       | .572     | .008       |
| Tactic                        | 113.40   | 1.60, 231.29 | <.001    | .439       |
| Age x Tactic                  | 3.87     | 3.19, 231.29 | .009     | .051       |
| <b>Cognitive Change</b>       |          |              |          |            |
| Age                           | 0.41     | 2, 145       | .666     | .006       |
| Tactic                        | 79.69    | 1.55, 225.04 | <.001    | .355       |
| Age x Tactic                  | 1.25     | 3.10, 225.04 | .291     | .017       |
| <b>Response Modulation</b>    |          |              |          |            |
| Age                           | 0.96     | 2, 144       | .387     | .013       |
| Tactic                        | 7.93     | 1.93, 263.05 | <.001    | .052       |
| Age x Tactic                  | 0.63     | 3.65, 263.05 | .631     | .009       |

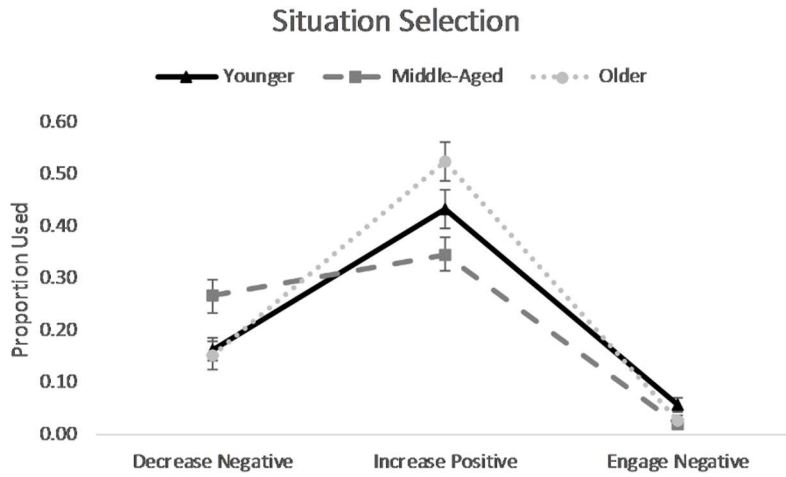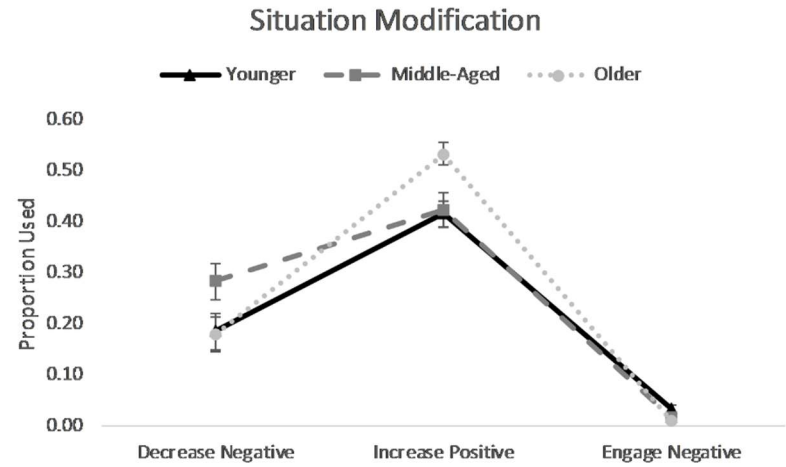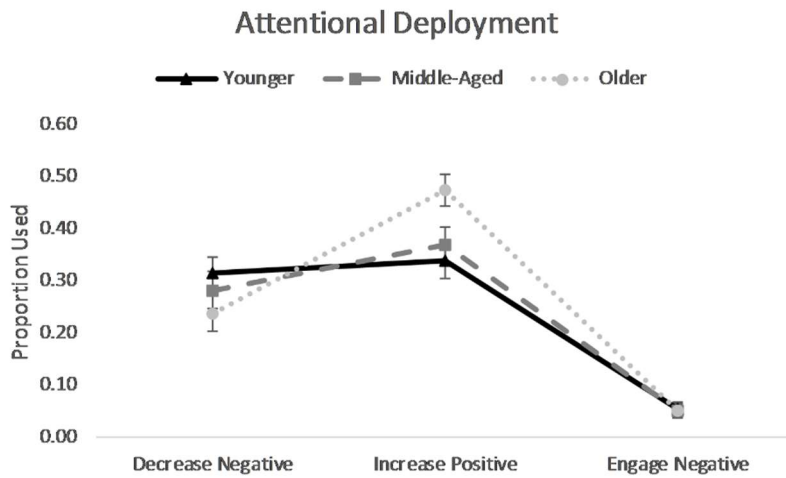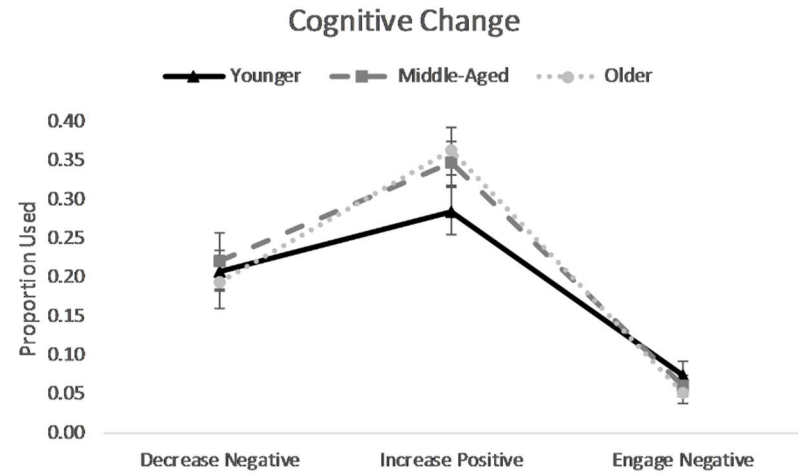

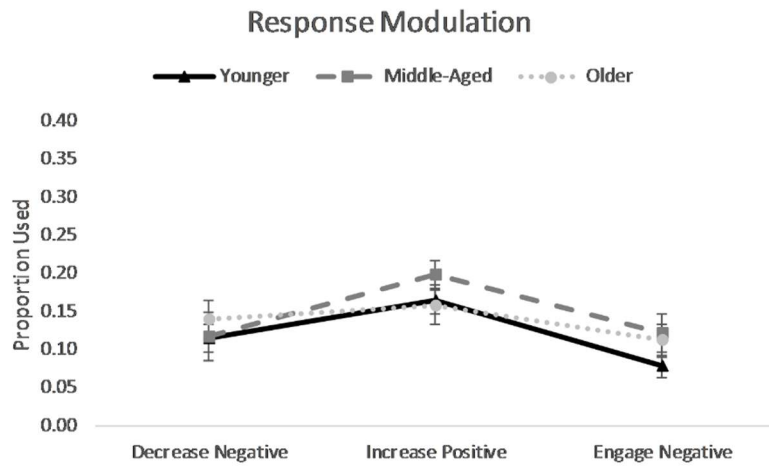

Table S9. *Tactic x Strategy for each Age Group*

| Effect             | <i>F</i> | df           | <i>p</i> | $\eta_p^2$ |
|--------------------|----------|--------------|----------|------------|
| Younger Adults     |          |              |          |            |
| Strategy           | 14.81    | 2.80, 131.39 | <.001    | .240       |
| Tactic             | 62.34    | 1.58, 74.14  | <.001    | .570       |
| Strategy x Tactic  | 19.50    | 5.34, 251.13 | <.001    | .393       |
| Middle-Aged Adults |          |              |          |            |
| Strategy           | 14.62    | 3.26, 156.51 | <.001    | .233       |
| Tactic             | 54.82    | 1.75, 84.15  | <.001    | .533       |
| Strategy x Tactic  | 10.91    | 4.68, 224.64 | <.001    | .185       |
| Older Adults       |          |              |          |            |
| Strategy           | 18.54    | 3.20, 156.74 | <.001    | .275       |
| Tactic             | 92.37    | 1.41, 69.06  | <.001    | .653       |
| Strategy x Tactic  | 23.76    | 5.77, 282.94 | <.001    | .327       |

### Younger Adults

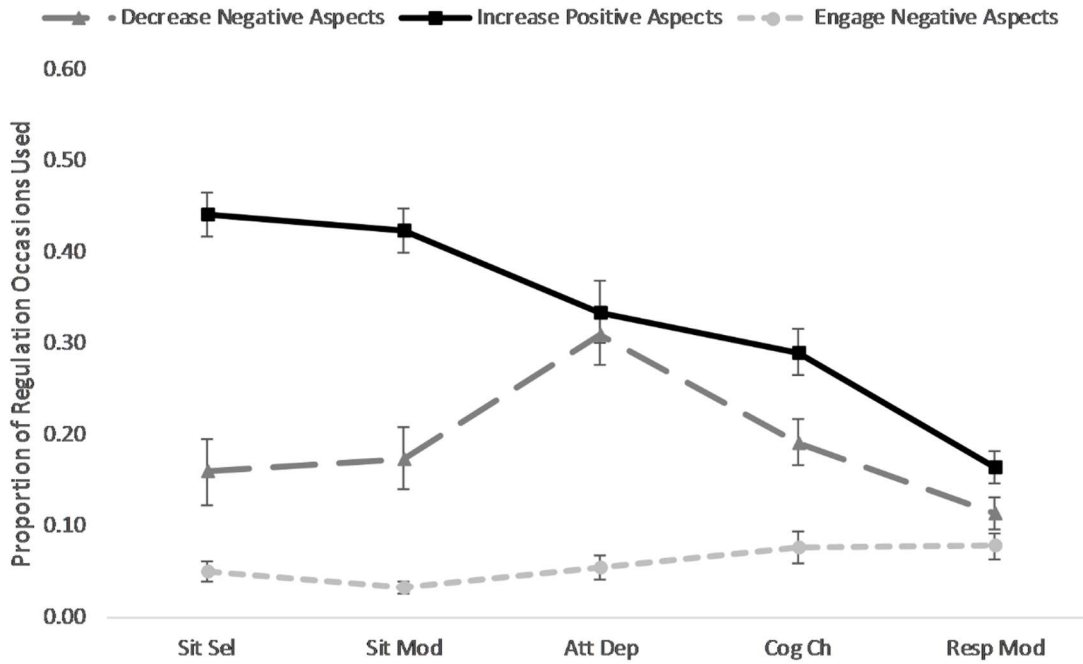

### Middle-Aged Adults

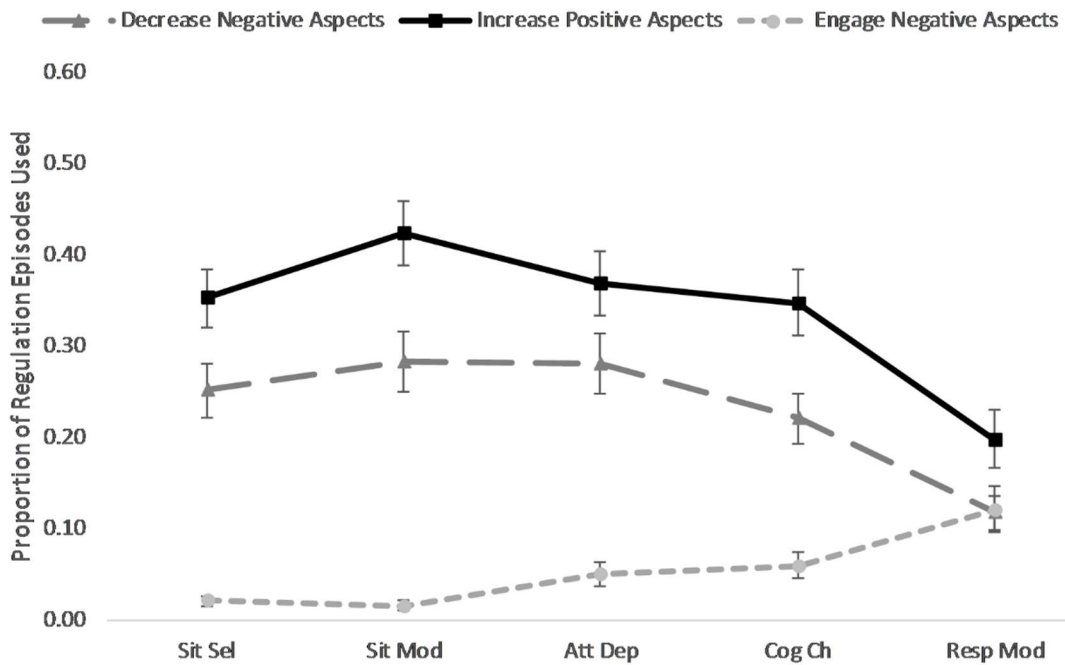



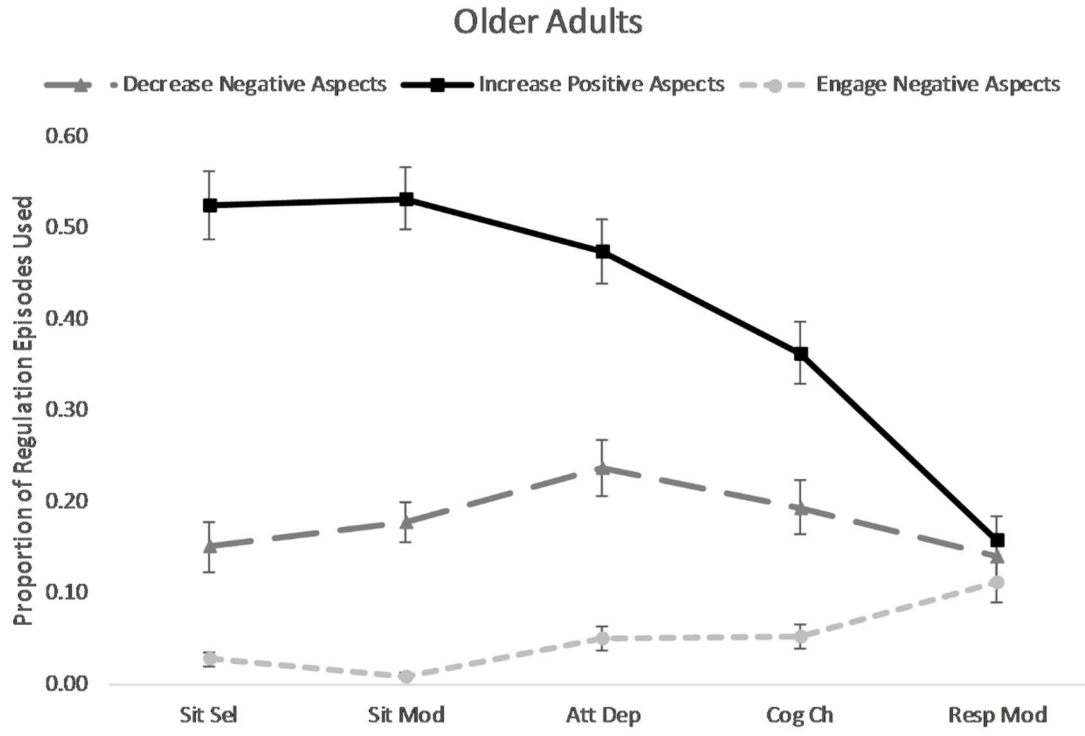

**How many strategies and tactics did participants tend to use in each episode?**Table S10. *Episode-Level Average Numbers of Strategies and Tactics Used Per Episode*

| Sum of                         | Possible | Mean | SD   | Min. | Max. |
|--------------------------------|----------|------|------|------|------|
| Strategies                     | 5        | 3.25 | 1.44 | 0    | 5    |
| Tactics                        | 18       | 3.64 | 1.94 | 0    | 14   |
| Situation Selection Tactics    | 4        | 0.82 | 0.53 | 0    | 3    |
| Situation Modification Tactics | 4        | 0.85 | 0.58 | 0    | 3    |
| Attentional Deployment Tactics | 3        | 0.75 | 0.60 | 0    | 3    |
| Cognitive Change Tactics       | 4        | 0.77 | 0.72 | 0    | 4    |
| Response Modulation Tactics    | 3        | 0.44 | 0.56 | 0    | 3    |
| Increasing Positive Aspects    | 5        | 1.97 | 1.48 | 0    | 5    |
| Decreasing Negative Aspects    | 5        | 1.03 | 1.24 | 0    | 5    |
| Engaging Negative Aspects      | 5        | 0.32 | 0.65 | 0    | 5    |

**Were there age differences in number of strategies and tactics used within episodes?**Table S11. *Person-Level Average Numbers of Strategies and Tactics Used Per Episode*

| Outcome                        | YA          | MA          | OA          | All         |
|--------------------------------|-------------|-------------|-------------|-------------|
| Strategies                     | 2.87 (.83)  | 3.01 (1.16) | 3.34 (.97)* | 3.08 (1.01) |
| Tactics                        | 3.31 (1.18) | 3.49 (1.56) | 3.49 (1.13) | 3.39 (1.30) |
| Situation Selection Tactics    | .78 (.31)   | .67 (.32)   | .79 (.27)   | .75 (.30)   |
| Situation Modification Tactics | .77 (.28)   | .81 (.36)   | .93 (.27)   | .80 (.31)   |
| Attentional Deployment Tactics | .69 (.34)   | .69 (.36)   | .74 (.28)   | .71 (.33)   |
| Cognitive Change Tactics       | .74 (.43)   | .73 (.44)   | .71 (.34)   | .72 (.40)   |
| Response Modulation Tactics    | .35 (.23)   | .44 (.34)   | .41 (.30)   | .40 (.29)   |
| Increasing Positive Aspects    | 1.71 (.74)  | 1.69 (.90)  | 2.05 (.81)* | 1.82 (.83)  |
| Decreasing Negative Aspects    | .91 (.62)   | 1.15 (.86)  | .98 (.75)   | .98 (.75)   |
| Engaging Negative Aspects      | .31 (.32)   | .27 (.28)   | .24 (.27)   | .27 (.29)   |

*Note.* None of the one-way ANOVA were significant at  $p < .05$ . \* Two pairwise contrasts

between younger and older adults were significant at  $p < .05$ .

**Was the number of strategies or tactics related to change in affect from before to after regulation?**Table S12. *Affect Change as a Function of Sums of Strategies and Tactics*

| Outcome                         | Intercept     | MA           | OA          | Sum          | Sum*MA      | Sum*OA      |
|---------------------------------|---------------|--------------|-------------|--------------|-------------|-------------|
| All strategies                  | 1.19 (.10)*** | -.48 (.14)** | -.32 (.14)* | .22 (.04)*** | -.08 (.05)  | -.06 (.06)  |
| All Situation Selection         | 1.14 (.11)*** | -.42 (.15)** | -.22 (.15)  | .15 (.08)    | -.13 (.11)  | -.33 (.13)* |
| All Situation Modification      | 1.16 (.10)*** | -.42 (.15)** | -.22 (.14)  | .35 (.10)*** | -.07 (.12)  | -.06 (.14)  |
| All Attentional Deployment      | 1.13 (.09)*** | -.41 (.14)** | -.23 (.13)  | .21 (.09)*   | .05 (.14)   | .22 (.15)   |
| All Cognitive Change            | 1.13 (.09)*** | -.40 (.15)** | -.20 (.14)  | .18 (.08)*   | .13 (.11)   | .11 (.11)   |
| All Response Modulation         | 1.13 (.10)*** | -.42 (.15)** | -.21 (.14)  | .18 (.08)*   | -.04 (.11)  | -.06 (.12)  |
| All Tactics                     | 1.17 (.10)*** | -.41 (.15)** | -.23 (.14)  | .15 (.03)*** | -.31 (.05)  | -.02 (.05)  |
| All Positive-Increasing Tactics | 1.16 (.10)*** | -.47 (.15)*  | -.24 (.14)  | .15 (.05)**  | .01 (.07)   | -.03 (.07)  |
| All Negative-Decreasing Tactics | 1.14 (.10)*** | -.42 (.15)** | -.22 (.14)  | .14 (.05)**  | -.12 (.06)* | -.10 (.06)  |
| All Negative-Engaging Tactics   | 1.11 (.10)*** | -.40 (.15)** | -.21 (.14)  | -.08 (.10)   | -.08 (.17)  | .00 (.14)   |

*Note.* Each row represents a separate multilevel model. Use of more overall strategies and overall tactics were associated with greater change in affect. Use of more situation modification, attentional deployment, cognitive change, and response modulation were

associated with greater changes in affect (more positive affect from before to after regulation). Use of more tactics that increased positive aspects of the situation or experience, and use of more tactics that decreased negative aspects, were both associated with greater change in affect. The number of tactics aimed at decreasing negative aspects of the situation or experience was not associated with affect change for middle-aged adults. The number of situation selection tactics used was not associated with affect change for older adults.

\*  $p < .05$ , \*\*  $p < .01$ , \*\*\*  $p < .001$ .

**How were the strategies correlated within episodes?**Table S13. *Episode-level correlations among emotion regulation strategies*

|             | Situation<br>Selection | Situation<br>Modification | Attentional<br>Deployment | Cognitive<br>Change | Response<br>Modulation |
|-------------|------------------------|---------------------------|---------------------------|---------------------|------------------------|
| Sit. Sel.   | 1.00                   | <b>0.30</b>               | 0.16                      | 0.13                | 0.11                   |
| Sit. Mod.   |                        | 1.00                      | <b>0.31</b>               | <b>0.27</b>         | 0.17                   |
| Att. Dep.   |                        |                           | 1.00                      | <b>0.44</b>         | <b>0.25</b>            |
| Cog. Change |                        |                           |                           | 1.00                | <b>0.29</b>            |
| Resp. Mod.  |                        |                           |                           |                     | 1.00                   |

*Note.* Correlations above  $|.20|$  are bolded.

**How were the tactics correlated within episodes?**Table S14. *Episode-Level Correlations Among Emotion Regulation Tactics*

|    | 1           | 2          | 3          | 4           | 5          | 6         | 7          | 8          | 9          | 10        | 11         | 12        | 13        | 14        | 15         |
|----|-------------|------------|------------|-------------|------------|-----------|------------|------------|------------|-----------|------------|-----------|-----------|-----------|------------|
|    | SS<br>Pos   | SS<br>Avd  | SS<br>Neg  | SM<br>Pos   | SM<br>Lss  | SM<br>Neg | AD<br>Pos  | AD<br>Dis  | AD<br>Neg  | CC<br>Pos | CC<br>Det  | CC<br>Neg | RM<br>Pos | RM<br>Sup | RM<br>Expr |
| 2  | <b>-.24</b> |            |            |             |            |           |            |            |            |           |            |           |           |           |            |
| 3  | -.14        | -.10       |            |             |            |           |            |            |            |           |            |           |           |           |            |
| 4  | <b>.41</b>  | -.11       | -.09       |             |            |           |            |            |            |           |            |           |           |           |            |
| 5  | -.07        | <b>.30</b> | .04        | <b>-.21</b> |            |           |            |            |            |           |            |           |           |           |            |
| 6  | -.09        | -.02       | <b>.24</b> | -.12        | -.05       |           |            |            |            |           |            |           |           |           |            |
| 7  | <b>.25</b>  | -.09       | -.09       | <b>.29</b>  | .00        | -.07      |            |            |            |           |            |           |           |           |            |
| 8  | -.12        | <b>.27</b> | -.02       | -.10        | <b>.24</b> | -.04      | -.22       |            |            |           |            |           |           |           |            |
| 9  | -.09        | .03        | .18        | -.09        | .06        | .16       | -.11       | -.08       |            |           |            |           |           |           |            |
| 10 | <b>.24</b>  | -.06       | -.06       | <b>.30</b>  | -.03       | -.08      | <b>.37</b> | -.04       | -.05       |           |            |           |           |           |            |
| 11 | -.08        | <b>.26</b> | -.02       | -.02        | <b>.22</b> | .00       | .01        | <b>.28</b> | .02        | -.09      |            |           |           |           |            |
| 12 | -.05        | .07        | .10        | -.01        | .08        | .07       | .01        | .11        | <b>.28</b> | -.03      | .04        |           |           |           |            |
| 13 | .02         | .08        | .00        | .08         | .07        | -.05      | .13        | .09        | -.02       | .14       | .07        | .05       |           |           |            |
| 14 | -.05        | .17        | .04        | -.05        | .15        | -.02      | .02        | .18        | .02        | .00       | <b>.20</b> | .04       | .00       |           |            |
| 15 | .04         | -.04       | .05        | .09         | -.03       | .09       | .09        | -.06       | .10        | .11       | -.05       | .08       | -.11      | -.12      |            |

*Note.* Correlations above  $|\cdot 20|$  are bolded. SS = Situation Selection, SM = Situation Modification, AD = Attentional Deployment, CC = Cognitive Change, RM = Response Modulation

**Which tactics tended to co-occur within people?**Table S15. *Person-level exploratory principal components analysis on emotion regulation tactic use*

|                         | Factor 1 | Factor 2 | Factor 3 | Factor 4 | Factor 5 |
|-------------------------|----------|----------|----------|----------|----------|
| AD Distract Negative    | .828     |          |          |          |          |
| SS Avoid Negative       | .817     |          |          |          |          |
| CC Detached Reappraisal | .811     |          |          |          |          |
| RM Suppression          | .720     |          |          |          |          |
| SM Less Negative        | .646     |          |          |          |          |
| RM Masking              | .482     |          |          |          |          |
| SM More Positive        |          | .822     |          |          |          |
| AD Attend to Positive   |          | .814     |          |          |          |
| CC Positive Reappraisal |          | .798     |          |          |          |
| SS Seek Positive        |          | .729     |          |          |          |
| AD Attend to Negative   |          |          | .763     |          |          |
| CC Negative Focus       |          |          | .708     |          |          |
| CC Accept Emotions      |          |          | .588     | .438     |          |
| RM Express Emotions     |          |          | .565     |          |          |
| SS Stay in Situation    |          |          |          | .754     |          |
| SM Accept Situation     | .465     |          |          | .750     |          |
| SS Seek Negative        |          |          |          |          | .754     |
| SM More Negative        |          |          |          |          | .672     |

*Note.* Only factor loadings above .40 are shown. Factors indicate that people who used one tactic within the grouping more frequently also tended to use the others within the grouping, aggregated across episodes.



**Which strategies tended to co-occur within episodes?**Table S16. *Episode-level exploratory principal components analysis on emotion regulation tactic use*

|                         | Factor 1 | Factor 2 | Factor 3 | Factor 4 | Factor 5 |
|-------------------------|----------|----------|----------|----------|----------|
| AD Attend to Positive   | -.741    |          |          |          |          |
| CC Positive Reappraisal | -.702    |          |          |          |          |
| SM More Positive        | -.603    |          |          |          |          |
| SS Seek Positive        | -.468    |          |          | -.452    |          |
| RM Mask with Positive   | -.409    |          |          |          |          |
| SS Avoid Negative       |          | .668     |          |          |          |
| SM Less Negative        |          | .631     |          |          |          |
| AD Distract Negative    |          | .620     |          |          |          |
| CC Detached Reappraisal |          | .613     |          |          |          |
| RM Suppress Expression  |          | .465     |          |          |          |
| RM Express Emotion      |          |          | .583     |          |          |
| CC Negative Focus       |          |          | .577     |          |          |
| AD Attend to Negative   |          |          | .530     |          | .428     |
| SM Accept Situation     |          |          |          | .685     |          |
| CC Accept Emotion       |          |          |          | .639     |          |
| SS Stay in Situation    |          |          |          | .546     |          |
| SS Seek Negative        |          |          |          |          | .700     |
| SM More Negative        |          |          |          |          | .631     |

*Note.* Only factor loadings above .40 are shown. Factors indicate that across people, in episodes in which one tactic within the grouping was used, the other tactics within the group also tended to be used.

**What was the effectiveness of strategies on affect change when controlling for use of multiple strategies?**

Table S17. *Effectiveness of Multiple Emotion Regulation Strategies within Episodes*

| Effect                 | Coefficient | <i>t</i> | df   | <i>p</i> |
|------------------------|-------------|----------|------|----------|
| Intercept              | 0.47 (.15)  | 3.17     | 142  | .002**   |
| Main Effect MA         | -0.19 (.20) | -0.95    | 142  | .344     |
| Main Effect OA         | -0.00 (.22) | -0.02    | 142  | .985     |
| Situation Selection    | 0.17 (.09)  | 1.83     | 2359 | .067     |
| MA x SS                | -0.27 (.12) | -2.19    | 2359 | .020*    |
| OA x SS                | -0.47 (.14) | -3.25    | 2359 | .001**   |
| Situation Modification | 0.34 (.11)  | 3.12     | 2359 | .002**   |
| MA x SM                | -0.09 (.16) | -0.58    | 2359 | .561     |
| OA x SM                | -0.05 (.15) | -0.37    | 2359 | .713     |
| Attentional Deployment | 0.14 (.10)  | 1.46     | 142  | .147     |
| MA x AD                | -0.04 (.17) | -0.22    | 142  | .825     |
| OA x AD                | 0.19 (.15)  | 1.23     | 142  | .221     |
| Cognitive Change       | 0.25 (.09)  | 2.56     | 2359 | .010*    |
| MA x CC                | 0.07 (.13)  | 0.50     | 2359 | .618     |
| OA x CC                | 0.04 (.13)  | 0.34     | 2359 | .734     |
| Response Modulation    | 0.18 (.10)  | 1.93     | 142  | .056     |
| MA x RM                | -0.12 (.13) | -0.90    | 142  | .371     |
| OA x RM                | -0.18 (.13) | -1.37    | 142  | .172     |

*Note.* Predictors were entered into a single multilevel model. When controlling for all other strategies, situation modification and cognitive change were uniquely related to greater change in affect from before to after regulation. When controlling for other strategies, situation selection was less effective for both middle-aged and older adults, compared to younger adults.

**What was the effectiveness on affect change when controlling for use of multiple tactics?**Table S18. *Effectiveness of Multiple Emotion Regulation Tactics that Introduced or Increased Positive Aspects of the Situation or Experience*

| Effect                   | Coefficient | <i>t</i> | df   | <i>p</i> |
|--------------------------|-------------|----------|------|----------|
| Intercept                | .66 (.07)   | 8.84     | 143  | <.001*** |
| Seek Positive Situations | .04 (.05)   | .87      | 2278 | .383     |
| Situation Modification   | .21 (.06)   | 3.77     | 143  | <.001*** |
| Attentional Deployment   | .10 (.06)   | 1.74     | 143  | .085     |
| Positive Reappraisal     | .15 (.05)   | 3.34     | 2278 | <.001*** |
| Masking                  | .23 (.07)   | 3.11     | 2278 | .002**   |

*Note.* Predictors were entered into a single multilevel model. When controlling for all other tactics that introduced or increased positive aspects of the situation or experience, making situations more positive, positive reappraisal, and masking emotions with a smile were related to change in affect (more positive affect) from before to after regulation. There were no interactions with age (*p*'s > .10).

Table S19. *Effectiveness of Multiple Emotion Regulation Tactics that Avoided or Decreased Negative Aspects of the Situation or Experience*

| Effect                    | Coefficient | <i>t</i> | df   | <i>p</i> |
|---------------------------|-------------|----------|------|----------|
| Intercept                 | 0.85 (.07)  | 13.79    | 143  | <.001*** |
| Avoid Negative Situations | -0.16 (.06) | -2.52    | 143  | .013*    |
| Situation Modification    | 0.14 (.06)  | 2.45     | 2135 | .015*    |
| Attentional Deployment    | 0.09 (.06)  | 1.48     | 2135 | .138     |
| Detached Reappraisal      | 0.19 (.07)  | 2.82     | 143  | .006**   |
| Expressive Suppression    | -0.02 (.08) | -0.22    | 143  | .828     |

*Note.* When controlling for all other tactics that decreased or avoided negative aspects of the situation or experience, situation modification and detached reappraisal were significantly related to increases in positive affect, whereas avoiding negative situations was associated with increases in negative affect. No interactions with age were significant ( $p$ 's > .05).

\*  $p < .05$ , \*\*  $p < .01$ , \*\*\*  $p < .001$ .

Table S20. *Effectiveness of Multiple Negative-Engaging Emotion Regulation Tactics on Affect Change*

| Effect                   | Coefficient | <i>t</i> | df   | <i>p</i> |
|--------------------------|-------------|----------|------|----------|
| Intercept                | 0.92 (.06)  | 15.04    | 143  | <.001*** |
| Seek Negative Situations | -0.14 (.18) | -0.80    | 143  | .426     |
| Situation More Negative  | -0.48 (.22) | -2.22    | 143  | .028*    |
| Attend to Negative       | -0.10 (.15) | 0.66     | 2135 | .509     |
| Focus on Negative        | -0.15 (.12) | -1.24    | 143  | .217     |
| Express Emotions         | 0.02 (.10)  | 0.26     | 2135 | .796     |

*Note.* When controlling for all other tactics that engaged with aspects of the situation or experience only situation modification was related to affect change from before to after regulation. No interactions with age were significant (*p*'s > .25).

\* *p* < .05, \*\* *p* < .01, \*\*\* *p* < .001.

Table S21. *Effectiveness of Multiple Emotion Regulation Tactics Within Strategy on Affect Change*

| Effect                 | Coefficient | <i>t</i> | df   | <i>p</i> |
|------------------------|-------------|----------|------|----------|
| Situation Selection    |             |          |      |          |
| Intercept              | 0.89 (.07)  | 12.40    | 144  | <.001*** |
| Avoid Negative         | -0.04 (.07) | -0.52    | 144  | .602     |
| Seek Positive          | 0.11 (.05)  | 1.97     | 144  | .051     |
| Seek Negative          | -0.28 (.18) | -1.49    | 144  | .137     |
| Stay in Situation      | -0.19 (.13) | -1.46    | 144  | .146     |
| Situation Modification |             |          |      |          |
| Intercept              | 0.67 (.07)  | 9.48     | 144  | <.001*** |
| Less Negative          | 0.26 (.07)  | 4.00     | 144  | <.001*** |
| More Positive          | 0.37 (.07)  | 5.34     | 144  | <.001*** |
| More Negative          | -0.32 (.23) | -1.46    | 144  | .177     |
| Accept Situation       | 0.19 (.09)  | 2.13     | 144  | .035*    |
| Attentional Deployment |             |          |      |          |
| Intercept              | 0.70 (.07)  | 10.40    | 144  | <.001*** |
| Distract from Negative | 0.25 (.07)  | 3.71     | 144  | <.001*** |
| Attend to Positive     | 0.33 (.07)  | 4.84     | 144  | <.001*** |
| Attend to Negative     | -0.13 (.15) | -0.89    | 144  | .373     |
| Cognitive Change       |             |          |      |          |
| Intercept              | 0.72 (.07)  | 11.62    | 144  | <.001*** |
| Detached Reappraisal   | 0.27 (.07)  | 3.97     | 2359 | <.001*** |
| Positive Reappraisal   | 0.33 (.06)  | 6.68     | 144  | <.001*** |

|                     |             |       |      |          |
|---------------------|-------------|-------|------|----------|
| Focus on Negative   | -0.10 (.13) | -0.78 | 144  | .435     |
| Accept Emotions     | 0.19 (.07)  | 2.64  | 2359 | .008**   |
| Response Modulation |             |       |      |          |
| Intercept           | 0.85 (.07)  | 13.56 | 143  | <.001*** |
| Suppress Expression | 0.05 (.07)  | 0.68  | 143  | .499     |
| Mask with Positive  | 0.28 (.08)  | 3.69  | 143  | <.001*** |
| Express Emotion     | 0.03 (.10)  | 0.35  | 143  | .726     |

*Note.* All tactics within the strategy were entered simultaneously. Each strategy was tested separately; therefore, number of predictors ranged from 3 to 4. None of the age interactions were significant for situation selection ( $p$ 's > .05), situation modification ( $p$ 's > .10), attentional deployment ( $p$ 's > .10), cognitive change ( $p$ 's > .15), or response modulation ( $p$ 's > .20).

\*  $p < .05$ , \*\*  $p < .01$ , \*\*\*  $p < .001$ .

**Age as a Continuous Predictor**Table S22. *Results of Multiple Regression with Age as a Continuous Predictor of Goals and Regulation (Linear & Quadratic Effects)*

|                        | Age $\beta$ | <i>t</i> | <i>p</i> | Age <sup>2</sup> $\beta$ | <i>t</i> | <i>p</i> |
|------------------------|-------------|----------|----------|--------------------------|----------|----------|
| Affect Now             | .221*       | 2.62     | .010     | .056                     | 0.67     | .507     |
| Regulation             | .013        | 0.15     | .879     | .073                     | 0.85     | .397     |
| Goal: Down negative    | -.173*      | -2.04    | .043     | -.164                    | -1.93    | .056     |
| Goal: Down positive    | -.236**     | -2.80    | .007     | .016**                   | 0.19     | .006     |
| Goal: Up positive      | .202*       | 2.38     | .019     | .127                     | 1.50     | .136     |
| Goal: Up negative      | -.209*      | -2.47    | .015     | .011                     | 0.13     | .899     |
| Situation Selection    | .165        | 1.95     | .053     | .184*                    | 2.17     | .032     |
| Avoid negative         | -.099       | -1.18    | .241     | -.248**                  | -2.95    | .004     |
| Seek positive          | .226**      | 2.70     | .008     | .226**                   | 2.70     | .008     |
| Seek negative          | -.115       | -1.37    | .173     | .185*                    | 2.19     | .030     |
| Stay                   | -.058       | -0.68    | .497     | .210*                    | 2.49     | .014     |
| Situation Modification | .191*       | 2.23     | .027     | -.015                    | -0.17    | .864     |
| Less negative          | -.052       | -0.61    | .542     | -.195*                   | -2.28    | .024     |
| More positive          | .223*       | 2.62     | .010     | .074                     | 0.87     | .386     |
| More negative          | -.221*      | -2.60    | .010     | -.016                    | -0.18    | .854     |
| Accept situation       | -.073       | -0.85    | .397     | .088                     | 1.01     | .313     |
| Attention Deployment   | .230**      | 2.71     | .008     | .086                     | 1.02     | .312     |
| Distract               | -.136       | -1.58    | .117     | -.038                    | -0.44    | .664     |
| Toward positive        | .281**      | 3.36     | .001     | .151                     | 1.80     | .073     |
| Toward negative        | -.006       | -0.07    | .946     | .082                     | 0.94     | .349     |



|                     |       |       |      |       |       |      |
|---------------------|-------|-------|------|-------|-------|------|
| Cognitive Change    | .144  | 1.67  | .097 | .041  | 0.47  | .637 |
| Detached rea        | -.051 | -0.59 | .557 | -.037 | -0.42 | .673 |
| Positive rea        | .176* | 2.05  | .042 | .014  | 0.16  | .874 |
| Negative focus      | -.131 | -1.51 | .133 | -.011 | -0.13 | .895 |
| Accept emotions     | -.113 | -1.32 | .188 | .133  | 1.56  | .121 |
| Response Modulation | .087  | 1.00  | .319 | .053  | 0.61  | .544 |
| Suppression         | .042  | 0.48  | .631 | .046  | 0.52  | .602 |
| Masking             | -.006 | -0.07 | .941 | -.031 | -0.35 | .725 |
| Express             | .101  | 1.16  | .247 | .024  | 0.28  | .783 |

---

*Note.* Each row represents a separate multiple regression model.

\*  $p < .05$ , \*\*  $p < .01$ , \*\*\*  $p < .001$ .

Table S23. *Results of Multilevel Linear Models with Age as a Continuous Predictor of Affect Change*

|                        | Intercept      | Age           | Age <sup>2</sup> | Regulation     | Age x Reg    | Age <sup>2</sup> x Reg |
|------------------------|----------------|---------------|------------------|----------------|--------------|------------------------|
| Affect Change          | .924 (.058)*** | -.002 (.003)  | .0008 (.0002)*** |                |              |                        |
| Situation Selection    | .912 (.071)*** | .002 (.004)   | .0007 (.0003)*   | .019 (.055)    | -.005 (.004) | .0002 (.0003)          |
| Avoid Negative         | .945 (.059)*** | -.002 (.003)  | .0008 (.0002)*** | -.051 (.071)   | .003 (.005)  | .0004 (.0003)          |
| Seek Positive          | .868 (.062)*** | -.000 (.003)  | .0009 (.0002)*** | .145 (.056)*   | -.005 (.003) | -.0003 (.0002)         |
| Seek Negative          | .929 (.058)*** | -.002 (.003)  | .0008 (.002)***  | -.182 (.221)   | .002 (.010)  | .0009 (.0007)          |
| Stay                   | .949 (.059)*** | -.001 (.003)  | .0008 (.0002)*** | -.261 (.113)*  | -.007 (.008) | .0005 (.0006)          |
| Situation Modification | .628 (.075)*** | -.003 (.004)  | .0005 (.0003)    | .397 (.068)*** | .000 (.004)  | .0004 (.0003)          |
| Less Negative          | .891 (.058)*** | -.001 (.003)  | .0007 (.0002)*** | .184 (.056)**  | -.003 (.004) | .0005 (.0002)*         |
| More Positive          | .800 (.063)*** | .000 (.004)   | .0009 (.0002)*** | .283 (.064)*** | -.005 (.004) | -.0001 (.0003)         |
| More Negative          | .933 (.058)*** | -.002 (.003)  | .0008 (.0002)*** | -.442 (.228)   | .004 (.013)  | .0005 (.0008)          |
| Accept Situation       | .928 (.057)*** | -.002 (.003)  | .0008 (.0002)*** | -.000 (.084)   | .002 (.005)  | -.0001 (.0004)         |
| Attentional Deployment | .664 (.069)*** | -.010 (.005)* | .0003 (.0003)    | .349 (.074)*** | .009 (.005)  | .0006 (.0003)          |
| Distract from Negative | .896 (.059)*** | -.001 (.003)  | .0007 (.0002)**  | .924 (.056)    | -.002 (.003) | .0005 (.0002)          |
| Attend to Positive     | .832 (.063)*** | -.004 (.004)  | .0008 (.0002)*** | .217 (.064)*** | .002 (.003)  | -.0001 (.0002)         |
| Attend to Negative     | .929 (.056)*** | -.003 (.003)  | .0008 (.0002)*** | -.289 (.150)   | .009 (.010)  | .0000 (.0001)          |
| Cognitive Change       | .667 (.059)*** | -.006 (.003)  | .0007 (.0002)**  | .399 (.056)*** | .004 (.003)  | .0001 (.0002)          |

|                        |                |              |                  |                |              |                |
|------------------------|----------------|--------------|------------------|----------------|--------------|----------------|
| Detached Reappraisal   | .890 (.058)*** | -.001 (.003) | .0008 (.0002)*** | .197 (.069)**  | -.004 (.005) | -.0000 (.0003) |
| Positive Reappraisal   | .929 (.056)*** | -.003 (.003) | .0008 (.0002)*** | -.289 (.150)   | .009 (.010)  | .0000 (.0007)  |
| Negative Focus         | .932 (.058)*** | -.003 (.003) | .0008 (.0002)*** | -.064 (.113)   | .010 (.006)  | .0006 (.0005)  |
| Accept Emotions        | .920 (.057)*** | -.002 (.003) | .0008 (.0002)*** | .054 (.073)    | .002 (.004)  | .0003 (.0003)  |
| Response Modulation    | .850 (.061)*** | -.002 (.003) | .0009 (.0002)*** | .182 (.055)**  | .001 (.003)  | -.0001 (.0002) |
| Expressive Suppression | .926 (.059)*** | -.003 (.003) | .0008 (.0002)*** | -.016 (.073)   | .006 (.005)  | .0002 (.0003)  |
| Masking with Positive  | .875 (.059)*** | -.001 (.003) | .0008 (.0002)*** | .273 (.077)*** | -.001 (.004) | .0000 (.0003)  |
| Express Negative       | .992 (.058)*** | -.002 (.003) | .0008 (.0002)*** | .009 (.099)    | -.004 (.005) | -.0002 (.0003) |

---

*Note.* Each row represents a separate multilevel model. \*  $p < .05$ , \*\*  $p < .01$ , \*\*\*  $p < .001$ .

### Multiverse Analysis

Note. All analyses were conducted using a strict alpha level of .05. SS = situation selection, SM = situation modification, AD = attentional deployment, CC = cognitive change, RM = response modulation. POS = tactics that introduced or increased positive aspects of the situation or experience, NEU = tactics that avoided or decreased negative aspects, NEG = tactics that engaged with negative aspects. YA = younger adults, MA = middle-aged adults, OA = older adults. An equivalent sign ( $\approx$ ) indicates no significant difference, not statistical equivalence. Surveys in the data sets were filtered as follows:

- A. The original data set from the first submission, which originally included suspected corrections and the first episode in a cramming session (if it occurred more than 30 minutes after the previous one).
- B. **Reported in main manuscript.** Reflects more stringent exclusion criteria, as requested by reviewers, adding to the exclusion list both suspected mistakes and corrections, as well as all surveys associated with a cramming session.
- C. Surveys valid according to Version B, but only complete surveys, in which participants saw and responded to the minimum questions one would see if one completed a survey (this differed between the regulation and no regulation branches and so was determined separately)
- D. Surveys valid according to Version B but completed only within the first 10 days
- E. Surveys valid according to Version B but only the first five surveys of the day
- F. Surveys valid according to Version B but only the first five of the day, for the first 10 days (this meant that the maximum number of surveys was 50).
- G. All surveys from included participants (including mistakes/corrections, cramming, those partial surveys, those completed within 30 minutes of the previous one)
- H. All surveys from all participants, including those previously excluded.

Table S24. *Frequency of Regulation*

| Analysis                                | Result                 | Conclusion         |
|-----------------------------------------|------------------------|--------------------|
| First Submission (A)                    | $F(2,146)=.26, p=.773$ | No age differences |
| Main Manuscript (B)                     | $F(2,145)=.14, p=.870$ | No age differences |
| Complete Only (C)                       | $F(2,145)=.25, p=.777$ | No age differences |
| Within 10 Days (D)                      | $F(2,145)=.25, p=.247$ | No age differences |
| First 5 Surveys of the Day (E)          | $F(2,145)=.19, p=.830$ | No age differences |
| Within both Time Parameters (F)         | $F(2,145)=.24, p=.784$ | No age differences |
| All Surveys from Valid Participants (G) | $F(2,145)=.24, p=.789$ | No age differences |
| All Surveys from All Participants (H)   | $F(2,166)=.24, p=.788$ | No age differences |

Table S25. *Age Differences in Strategy Use: 5 (Strategy) x 3 (Age Group) ANOVA*

| Analysis                            | Result                                         | Contrasts/Conclusions                  |
|-------------------------------------|------------------------------------------------|----------------------------------------|
| <b>Main Effect of Strategy</b>      |                                                |                                        |
| First Submission                    | $F(3.18, 456.43)=79.01, p<.001, \eta_p^2=.354$ | SS $\approx$ SM > AD > CC > RM         |
| Main Manuscript                     | $F(3.39, 453.81)=78.58, p<.001, \eta_p^2=.355$ | SS $\approx$ SM > AD > CC > RM         |
| Complete Only                       | $F(3.16, 452.51)=76.42, p<.001, \eta_p^2=.348$ | SS $\approx$ SM > AD > CC > RM         |
| Within 10 Days                      | $F(3.25, 456.61)=72.40, p<.001, \eta_p^2=.336$ | SS $\approx$ SM > AD $\approx$ CC > RM |
| First 5 Surveys of the Day          | $F(3.15, 450.68)=75.04, p<.001, \eta_p^2=.344$ | SS $\approx$ SM > AD > CC > RM         |
| Within both Time Parameters         | $F(3.19, 455.87)=70.96, p<.001, \eta_p^2=.332$ | SS $\approx$ SM > AD $\approx$ CC > RM |
| All Surveys from Valid Participants | $F(3.17, 456.65)=83.53, p<.001, \eta_p^2=.367$ | SS $\approx$ SM > AD > CC > RM         |
| All Surveys from All Participants   | $F(3.21, 522.82)=67.57, p<.001, \eta_p^2=.293$ | SS $\approx$ SM > AD > CC > RM         |
| <b>Main Effect of Age</b>           |                                                |                                        |
| First Submission                    | $F(2, 144)=2.77, p=.066, \eta_p^2=.037$        | No significant difference              |
| Main Manuscript                     | $F(2, 143)=2.85, p=.061, \eta_p^2=.038$        | No significant difference              |
| Complete Only                       | $F(2, 143)=3.00, p=.053, \eta_p^2=.040$        | No significant difference              |
| Within 10 Days                      | $F(2, 143)=3.48, p=.034, \eta_p^2=.046$        | OA > YA                                |
| First 5 Surveys of the Day          | $F(2, 143)=3.31, p=.039, \eta_p^2=.045$        | OA > YA                                |

|                                     |                                        |         |
|-------------------------------------|----------------------------------------|---------|
| Within both Time Parameters         | $F(2,143)=3.83, p=.024, \eta_p^2=.051$ | OA > YA |
| All Surveys from Valid Participants | $F(2,144)=3.44, p=.035, \eta_p^2=.046$ | OA > YA |
| All Surveys from All Participants   | $F(2,163)=4.23, p<.016, \eta_p^2=.049$ | OA > YA |

---

 Age x Strategy Interaction

|                                     |                                               |                            |
|-------------------------------------|-----------------------------------------------|----------------------------|
| First Submission                    | $F(6.35, 457.43)=1.81, p=.092, \eta_p^2=.024$ | No significant interaction |
| Main Manuscript                     | $F(6.35, 453.81)=1.79, p=.092, \eta_p^2=.024$ | No significant interaction |
| Complete Only                       | $F(6.33, 452.51)=1.82, p=.090, \eta_p^2=.025$ | No significant interaction |
| Within 10 Days                      | $F(6.39, 456.61)=1.71, p=.111, \eta_p^2=.023$ | No significant interaction |
| First 5 Surveys of the Day          | $F(6.30, 450.68)=2.16, p=.043, \eta_p^2=.029$ | SM, AD: OA > YA            |
| Within both Time Parameters         | $F(6.38, 455.87)=2.03, p=.041, \eta_p^2=.028$ | SM, AD: OA > YA            |
| All Surveys from Valid Participants | $F(6.34, 456.65)=1.48, p=.181, \eta_p^2=.020$ | No significant interaction |
| All Surveys from All Participants   | $F(6.52, 522.82)=1.57, p=.149, \eta_p^2=.019$ | No significant interaction |

---

Table S26. *Age Differences in Tactic Use: 5 (Strategy) x 3 (Tactic Type) x 3 (Age Group) ANOVA*

| Analysis                            | Result                                                | Contrasts/Conclusions                  |
|-------------------------------------|-------------------------------------------------------|----------------------------------------|
| <b>Main Effect of Strategy</b>      |                                                       |                                        |
| First Submission                    | $F(3.37, 481.45) = 46.18, p < .001, \eta_p^2 = .244$  | SS $\approx$ SM $\approx$ AD > CC > RM |
| Main Manuscript                     | $F(3.38, 479.68) = 46.60, p < .001, \eta_p^2 = .247$  | SS $\approx$ SM $\approx$ AD > CC > RM |
| Complete Only                       | $F(3.37, 479.12) = 45.76, p < .001, \eta_p^2 = .244$  | SS $\approx$ SM $\approx$ AD > CC > RM |
| Within 10 Days                      | $F(3.36, 477.09) = 43.92, p < .001, \eta_p^2 = .236$  | SS $\approx$ SM $\approx$ AD > CC > RM |
| First 5 Surveys of the Day          | $F(3.35, 475.82) = 44.71, p < .001, \eta_p^2 = .239$  | SS $\approx$ SM $\approx$ AD > CC > RM |
| Within both Time Parameters         | $F(3.33, 473.39) = 42.96, p < .001, \eta_p^2 = .232$  | SS $\approx$ SM $\approx$ AD > CC > RM |
| All Surveys from Valid Participants | $F(3.36, 480.08) = 49.72, p < .001, \eta_p^2 = .258$  | SS $\approx$ SM $\approx$ AD > CC > RM |
| All Surveys from All Participants   | $F(3.55, 499.99) = 20.74, p < .001, \eta_p^2 = .128$  | SS $\approx$ SM $\approx$ AD > CC > RM |
| <b>Main Effect of Tactic</b>        |                                                       |                                        |
| First Submission                    | $F(1.59, 227.46) = 205.12, p < .001, \eta_p^2 = .589$ | Pos > Neu > Neg                        |
| Main Manuscript                     | $F(1.59, 226.26) = 202.62, p < .001, \eta_p^2 = .588$ | Pos > Neu > Neg                        |
| Complete Only                       | $F(1.59, 226.38) = 205.21, p < .001, \eta_p^2 = .591$ | Pos > Neu > Neg                        |
| Within 10 Days                      | $F(1.58, 223.75) = 206.72, p < .001, \eta_p^2 = .593$ | Pos > Neu > Neg                        |
| First 5 Surveys of the Day          | $F(1.59, 225.76) = 205.80, p < .001, \eta_p^2 = .592$ | Pos > Neu > Neg                        |



|                                     |                                                       |                            |
|-------------------------------------|-------------------------------------------------------|----------------------------|
| Within both Time Parameters         | $F(1.57, 223.02) = 208.53, p < .001, \eta_p^2 = .595$ | Pos > Neu > Neg            |
| All Surveys from Valid Participants | $F(1.60, 228.61) = 208.90, p < .001, \eta_p^2 = .594$ | Pos > Neu > Neg            |
| All Surveys from All Participants   | $F(1.54, 217.05) = 202.93, p < .001, \eta_p^2 = .590$ | Pos > Neu > Neg            |
| <hr/>                               |                                                       |                            |
| Main Effect of Age                  |                                                       |                            |
| First Submission                    | $F(2, 143) = .77, p = .463, \eta_p^2 = .011$          | No significant difference  |
| Main Manuscript                     | $F(2, 142) = .75, p = .473, \eta_p^2 = .010$          | No significant difference  |
| Complete Only                       | $F(2, 142) = .68, p = .509, \eta_p^2 = .009$          | No significant difference  |
| Within 10 Days                      | $F(2, 142) = .71, p = .492, \eta_p^2 = .010$          | No significant difference  |
| First 5 Surveys of the Day          | $F(2, 142) = .75, p = .476, \eta_p^2 = .010$          | No significant difference  |
| Within both Time Parameters         | $F(2, 142) = .79, p = .456, \eta_p^2 = .011$          | No significant difference  |
| All Surveys from Valid Participants | $F(2, 143) = .91, p = .406, \eta_p^2 = .013$          | No significant difference  |
| All Surveys from All Participants   | $F(2, 141) = 2.20, p = .115, \eta_p^2 = .030$         | No significant difference  |
| <hr/>                               |                                                       |                            |
| Age x Strategy Interaction          |                                                       |                            |
| First Submission                    | $F(6.73, 481.45) = 0.78, p = .599, \eta_p^2 = .011$   | No significant interaction |
| Main Manuscript                     | $F(6.76, 479.68) = 0.83, p = .561, \eta_p^2 = .012$   | No significant interaction |
| Complete Only                       | $F(6.75, 479.12) = .86, p = .551, \eta_p^2 = .012$    | No significant interaction |

|                                     |                                              |                            |
|-------------------------------------|----------------------------------------------|----------------------------|
| Within 10 Days                      | $F(6.72,477.09)=.73, p=.639, \eta_p^2=.010$  | No significant interaction |
| First 5 Surveys of the Day          | $F(6.70,475.82)=1.00, p=.432, \eta_p^2=.014$ | No significant interaction |
| Within both Time Parameters         | $F(6.67,473.39)=.87, p=.524, \eta_p^2=.012$  | No significant interaction |
| All Surveys from Valid Participants | $F(6.71,480.08)=.78, p=.597, \eta_p^2=.011$  | No significant interaction |
| All Surveys from All Participants   | $F(7.09,499.99)=1.19, p=.303, \eta_p^2=.017$ | No significant interaction |

---

 Age x Tactic Interaction

|                                     |                                               |                                |
|-------------------------------------|-----------------------------------------------|--------------------------------|
| First Submission                    | $F(3.18, 227.46)=3.13, p=.024, \eta_p^2=.042$ | Positive tactics: OAs > YAs    |
| Main Manuscript                     | $F(11.61,824.71)=4.10, p<.001, \eta_p^2=.055$ | Positive tactics: OAs > YAs    |
| Complete Only                       | $F(3.19,226.38)=3.43, p=.016, \eta_p^2=.046$  | Positive tactics: OAs > YAs    |
| Within 10 Days                      | $F(3.15,223.75)=3.33, p=.019, \eta_p^2=.045$  | Positive tactics: OAs > YAs    |
| First 5 Surveys of the Day          | $F(3.18,225.76)=3.10, p=.025, \eta_p^2=.042$  | Positive tactics: OAs > YAs    |
| Within both Time Parameters         | $F(3.14,223.02)=3.05, p=.028, \eta_p^2=.041$  | Positive tactics: OAs > YAs    |
| All Surveys from Valid Participants | $F(3.20,228.61)=3.71, p=.011, \eta_p^2=.049$  | Positive tactics: OAs > YAs    |
| All Surveys from All Participants   | $F(3.08,217.05)=1.41, p=.240, \eta_p^2=.020$  | no significant age differences |

---

 Strategy x Tactic Interaction

|                                     |                                                |                                                                 |
|-------------------------------------|------------------------------------------------|-----------------------------------------------------------------|
| First Submission                    | $F(5.77, 825.39)=45.75, p<.001, \eta_p^2=.242$ | POS > NEU > NEG for all except RM:<br>Sup & Expr did not differ |
| Main Manuscript                     | $F(5.81, 824.71)=45.16, p<.001, \eta_p^2=.241$ | Same                                                            |
| Complete Only                       | $F(5.77, 819.57)=44.78, p<.001, \eta_p^2=.240$ | Same                                                            |
| Within 10 Days                      | $F(5.80, 823.94)=44.53, p<.001, \eta_p^2=.239$ | Same                                                            |
| First 5 Surveys of the Day          | $F(5.79, 822.70)=43.85, p<.001, \eta_p^2=.236$ | Same                                                            |
| Within both Time Parameters         | $F(5.80, 823.68)=43.06, p<.001, \eta_p^2=.233$ | Same                                                            |
| All Surveys from Valid Participants | $F(5.76, 823.87)=43.48, p<.001, \eta_p^2=.233$ | Same                                                            |
| All Surveys from All Participants   | $F(4.48, 631.64)=22.62, p<.001, \eta_p^2=.138$ | Same                                                            |

---

 Age x Strategy x Tactic Interaction

|                             |                                                |                                     |
|-----------------------------|------------------------------------------------|-------------------------------------|
| First Submission            | $F(11.54, 825.39)=4.17, p<.001, \eta_p^2=.055$ | POS tactics held for SS, SM, and AD |
| Main Manuscript             | $F(11.62, 824.71)=4.10, p<.001, \eta_p^2=.055$ | POS tactics held for SS, SM, and AD |
| Complete Only               | $F(11.54, 819.57)=4.08, p<.001, \eta_p^2=.054$ | POS tactics held for SM, AD         |
| Within 10 Days              | $F(11.61, 823.94)=3.53, p<.001, \eta_p^2=.047$ | POS tactics held for SM, AD         |
| First 5 Surveys of the Day  | $F(11.59, 822.70)=4.31, p<.001, \eta_p^2=.057$ | POS tactics held for SM, AD         |
| Within both Time Parameters | $F(11.60, 823.68)=3.75, p<.001, \eta_p^2=.050$ | POS tactics held for SM, AD         |

|                                     |                                                      |                               |
|-------------------------------------|------------------------------------------------------|-------------------------------|
| All Surveys from Valid Participants | $F(11.52, 823.87) = 4.19, p < .001, \eta_p^2 = .055$ | POS tactics held for SM, AD   |
| All Surveys from All Participants   | $F(8.96, 631.64) = 2.81, p = .003, \eta_p^2 = .038$  | No POS tactic age differences |

---

 Follow-Up One-Way ANOVA

|                  |                                          |
|------------------|------------------------------------------|
| First Submission | SS pos, SM pos, AD pos OA > YA           |
|                  | SS avd, SM less neg MA > YA              |
|                  | SS neg, SM more neg YA > MA, OA          |
| Main Manuscript  | SS pos, SM pos, AD pos OA > YA           |
|                  | SS avd, SM less neg MA > YA              |
|                  | SS neg, SM more neg YA > MA, OA          |
| Complete Only    | SM pos, AD pos OA > YA (SS now marg sig) |
|                  | SS avd neg, SM less neg MA > YA          |
|                  | SS seek neg, SM more neg YA > MA, OA     |
| Within 10 Days   | SM pos, AD pos OA > YA (SS now marg sig) |
|                  | SS avd neg, SM less neg MA > YA          |
|                  | SS seek neg, SM more neg YA > MA, OA     |

|                                     |                                                                  |
|-------------------------------------|------------------------------------------------------------------|
| First 5 Surveys of the Day          | SM pos, AD pos OA > YA (SS now marg sig)                         |
|                                     | SS avd neg, SM less neg MA > YA                                  |
|                                     | SS seek neg, SM more neg YA > MA, OA                             |
| Within both Time Parameters         | SM pos, AD pos OA > YA (SS now marg sig)                         |
|                                     | SS avd neg, SM less neg MA > YA                                  |
|                                     | SS seek neg, SM more neg YA > MA, OA                             |
| All Surveys from Valid Participants | SM pos, AD pos OA > YA (SS now marg sig)                         |
|                                     | SS avd neg, SM less neg MA > YA                                  |
|                                     | SS seek neg, SM more neg YA > MA, OA                             |
| All Surveys from All Participants   | Neu: MA > YA avoid neg, YA > OA distract                         |
|                                     | Neg: YA > MA, OA seek neg & make more neg, YA > OA neg cog focus |

---

Table S27. *Summary of Multiverse Analysis*

| Effect                      | Conclusion                                                                                                                                                                                                                                                                                                                                                                                                                          |
|-----------------------------|-------------------------------------------------------------------------------------------------------------------------------------------------------------------------------------------------------------------------------------------------------------------------------------------------------------------------------------------------------------------------------------------------------------------------------------|
| Frequency of regulation     | There was never a significant effect of age on frequency of regulation.                                                                                                                                                                                                                                                                                                                                                             |
| Strategy Use: 5 x 3 ANOVA   |                                                                                                                                                                                                                                                                                                                                                                                                                                     |
| Main effect of strategy     | The main effect of strategy was always significant at $p < .001$ , with effect sizes around .33-.35. Situation selection and modification did not differ in any analyses, and were always more frequently used than the others. In some cases, attentional deployment was more frequently used than cognitive change, though this effect was not significant in all analyses. Response modulation was always used least frequently. |
| Main effect of age          | A main effect of age emerged when examining surveys within expected time parameters, with OAs reporting more strategy use overall than YAs. Previous results had been non-significant with $p$ -values $> .07$ .                                                                                                                                                                                                                    |
| Strategy x age interaction  | An interaction emerged when examining the first five surveys of each day, with OAs reporting more situation modification and attentional deployment than YAs. This effect did not otherwise emerge.                                                                                                                                                                                                                                 |
| Tactic Use: 5 x 3 x 3 ANOVA |                                                                                                                                                                                                                                                                                                                                                                                                                                     |

|                               |                                                                                                                                                                                                                                                                                                                                                                                 |
|-------------------------------|---------------------------------------------------------------------------------------------------------------------------------------------------------------------------------------------------------------------------------------------------------------------------------------------------------------------------------------------------------------------------------|
| Main effect of strategy       | The main effect of strategy was always significant at $p < .001$ . In all cases, situation selection, situation modification, and attentional deployment tactics were used more frequently than cognitive change, with response modulation tactics being the most rarely used.                                                                                                  |
| Main effect of tactic         | The main effect of tactic was always significant at $p < .001$ . In all cases, people reported more frequent use of tactics that introduced or increased positive aspects of the situation or experience, and least frequent use of tactics that engaged with negative aspects, with those tactics that focused on avoiding or reducing negative aspects falling in the middle. |
| Main effect of age            | The main effect of age was never significant, with $p$ -values above .45.                                                                                                                                                                                                                                                                                                       |
| Strategy x age interaction    | The strategy x age interaction was never significant, with $p$ -values over .40.                                                                                                                                                                                                                                                                                                |
| Tactic x age interaction      | The tactic x age interaction was always significant at $p < .05$ . In all cases, older adults (but not middle-aged) reported more use of tactics that increased positive aspects of the situation or experience, compared to younger adults.                                                                                                                                    |
| Strategy x tactic interaction | The strategy x tactic interaction was always significant at $p < .001$ . In all cases, positive-aspect increasing tactics were used more frequently than negative-aspect reducing, with negative-engaging tactics used the least, except for the strategy of response modulation, in                                                                                            |

which expression (engaging negative aspects) and suppression (reducing negative aspects) did not differ; both were used less frequently than masking (increasing positive aspects).

Strategy x tactic x age interaction    The interaction was always significant at  $p < .001$ . Older adults always used more positive situation modification and attentional deployment than younger adults; the age difference for situation selection was sometimes significant but more often not. For negative-decreasing tactics, MAs (but not OAs) always used more SS avoidance and SM making situations less negative than YAs. For negative-engaging tactics, YAs always used more SS seeking negative situations and SM making situations more negative than both MAs and OAs.

---
